# Supplementary material
Source: PubMed Central journal article supplement (PMC4410636)
Supplement: ncomms7863-s1.pdf [file ncomms7863-s1.pdf]

**Supplementary Table 1 : 103 gene variants found in 4/5 HAPH cattle and 1/5 Unaffected**

| <b>Bovine Chromosome</b> | <b>Bovine Gene</b> | <b>Human Protein/Function</b>                    |
|--------------------------|--------------------|--------------------------------------------------|
| chr25                    | ABCA3              | surfactant transporting gene                     |
| chr6                     | AFAP1              | actin filament gene                              |
| chr21                    | AKAP6              | anchors a protein kinase to membrane             |
| chr21                    | ANKRD34C           | membrane proteins that promote channels          |
| chr1                     | AP2M1              | acidification protein                            |
| chr10                    | AQPEP              | metalloprotein embryonal maternal interface      |
| chr15                    | ARHGAP20           | rho gtpase activating protein                    |
| chr13                    | ARMC3              | many basic functions armadillo- cell             |
| chr17                    | BBS12              | membrane trafficking Bardet-Biedle syndrome      |
| chr5                     | BCDIN3D            | miRNA processing                                 |
| chr23                    | BTN3A3             | histocompatibility gene                          |
| chr11                    | BUB1               | mitotic spindle control gene                     |
| chr1                     | C1H21orf33         | chicken gene, involved in cancer, not much known |
| chr23                    | C4A                | complement factor 4 inflammation                 |
| chr18                    | CA5A               | carbonic anhydrase, kidney other organs          |
| chr5                     | CBX6               | transcriptional repression gene                  |
| chr3                     | CCBL2              | tryptophan metabolism                            |
| chr22                    | CCK                | cholecystokinin gene                             |
| chr18                    | CES5A              | hydrolysis of xenobiotics                        |
| chr25                    | CLN3               | lysosomes neurodegenerative                      |
| chr11                    | COQ4               | coenzyme Q2 biosynthesis, neurological           |
| chr13                    | COX4I2             | cytochrome c oxidase subunit 4                   |
| chr23                    | CRISP1             | sperm and egg sticky protein                     |
| chr10                    | DHRS1              | basic oxyreductase in multiple pathways          |
| chr19                    | DHRS13             | same as above                                    |
| chr19                    | DHX33              | DEAD box protein basic cell functions            |
| chr18                    | DHX34              | same as above                                    |
| chr5                     | DNM1L              | mitochondrial division, Dynamin, neuro           |
| chr9                     | ECHDC1             | toxic metabolite proof reading liver?            |
| chr11                    | EPAS1              | HIF2alpha                                        |
| chr10                    | FLVCR2             | CNS Ca transporter gene                          |
| chr19                    | FN3K               | fructosamine kinase, metabolic                   |
| chr5                     | FOXRED2            | endoplasmic reticulum degradation                |
| chr7                     | GLRA1              | CNS post synaptic inhibition                     |
| chr3                     | GON4L              | transcription factor not much known              |
| chr2                     | GORASP2            | golgi restacking protein                         |
| chr13                    | GPR158             | G protein coupled receptor                       |
| chr3                     | GPSM2              | G protein controller deafness                    |

|       |           |                                                                    |
|-------|-----------|--------------------------------------------------------------------|
| chr23 | GSTA3     | zinc finger t cells and endothelium                                |
| chr17 | GSTT1     | glutathione conjugation                                            |
| chr18 | HRC       | cholesterol binding sarcoplasmic reticulum                         |
| chr22 | HRH1      | histamine H1 receptor                                              |
| chr29 | IFITM3    | interferon influenza resistance                                    |
| chr11 | KLF11     | diabetes and apoptosis                                             |
| chr21 | KLHL25    | ectoderm neural complex gene                                       |
| chr5  | KLRJ1     | natural killer cell domain                                         |
| chr23 | LOC525599 | butyrophilin family uncharacterized                                |
| chr4  | LRRC17    | Leucine-rich repeat-containing protein 17                          |
| chr23 | MIC1      | Macrophage inhibitory cytokine-1                                   |
| chr23 | MLIP      | Muscular-Enriched A-Type Laminin-Interacting                       |
| chr1  | MRPL47    | mitochondrial protein synthesis                                    |
| chr7  | NDST1     | Bifunctional heparan sulfate N-deacetylase/N-sulfotransferase 1    |
| chr28 | NDST2     | same as above                                                      |
| chr22 | NEK4      | testicular protein of NEK family                                   |
| chr8  | NOL6      | nucleolar protein 6                                                |
| chr10 | NRDE2     | RNA interference gene                                              |
| chr2  | OSGEPL1   | O-sialoglycoprotein endopeptidase-like 1                           |
| chr3  | OVGP1     | OVGP1 oviductal glycoprotein 1                                     |
| chr7  | PCDH12    | protocadherin gene family, a subfamily of the cadherin superfamily |
| chr18 | PDPR      | PDPR pyruvate dehydrogenase phosphatase                            |
| chr16 | PHF13     | finger protein male fertility                                      |
| chr18 | PNMAL1    | paraneoplastic MA antigen family                                   |
| chr6  | PSAPL1    | Prosaposin-like 1                                                  |
| chr11 | PTGS1     | prostaglandin-endoperoxide synthase 1                              |
| chr7  | RAB3D     | RAS oncogene family                                                |
| chr8  | RCL1      | RNA terminal phosphate cyclase-like 1                              |
| chr7  | RFX2      | RFX2                                                               |
| chr16 | RGS18     | regulator of G-protein signaling                                   |
| chr23 | RHAG      | erythrocyte-specific                                               |
| chr29 | RIN1      | expressed in cancers                                               |
| chr23 | RPP40     | ribonuclease subunit for making t RNA                              |
| chr3  | RPS8      | ribosomal subunit protein                                          |
| chr22 | RPUSD3    | RNA pseudouridylate synthase domain containing 3                   |
| chr28 | RTKN2     | inflammation, lupus, nf Kappa b                                    |
| chr10 | SEMA6D    | Semaphorins                                                        |
| chr6  | SHROOM3   | Shroom protein family                                              |
| chr1  | SIDT1     | transmembrane family                                               |
| chr8  | SLC1A1    | neuronal glutamine transporter                                     |
| chr19 | SLC25A11  | transports 2-oxoglutarate across mitochondria                      |

|       |           |                                                                  |
|-------|-----------|------------------------------------------------------------------|
| chr19 | SPAG5     | sperm mitotic spindle protein                                    |
| chr7  | SPINK5    | serine protease inhibitor                                        |
| chr3  | ST7L      | tumor suppressor gene                                            |
| chr6  | TBC1D14   | Negative regulator of starvation-induced autophagosome formation |
| chr5  | TBC1D22A  | protein homodimerization activity                                |
| chr2  | TCEB3     | transcription elongation factor                                  |
| chr14 | TERF1     | telomeric repeat binding factor (NIMA-interacting)               |
| chr11 | THUMPD2   | methyl transferase poorly characterized                          |
| chr22 | TMEM42    | transmembrane protein nothing known                              |
| chr16 | TMEM63A   | transmembran protein nothing known                               |
| chr15 | TRIM5     | is a retrovirus restriction factor                               |
| chr3  | TTF2      | transcription termination factor, RNA polymerase II.             |
| chr5  | TXN2      | mitochondrial member of the thioredoxin family,                  |
| chr10 | UNC13C    | poorly characterized membrane diacylglycerol                     |
| chr15 | USH1C     | eye and ear stereocilia                                          |
| chr16 | USH2A     | same as above Usher syndrome                                     |
| chr9  | VNN1      | hematopoietic cell trafficking                                   |
| chr28 | WDFY4     | no information                                                   |
| chr25 | WDR24     | no information                                                   |
| chr3  | ZMYM6     | cell morphology and cytoskeletal organization.                   |
| chr19 | DHX33     | dead box protein family cell basic function                      |
| chr23 | MIC1      | already seen above #54                                           |
| chr7  | DNM2;DNM2 | Dynamins                                                         |
| chr19 | DHX33     | dead box proteins as above                                       |

## Supplementary Table 2

| <i>Ear Tag #</i>               | <i>mPAP (mmHg)</i> | <i>Zygoty</i>    |
|--------------------------------|--------------------|------------------|
| 2155                           | 64                 | Heterozyote G/A  |
| 2355                           | 54                 | Heterozygote G/A |
| 2171                           | 53                 | Heterozygote G/A |
| 2201                           | 53                 | Heterozygote G/A |
| 2156                           | 48                 | Wildtype G/G     |
| 2200                           | 48                 | Homozygote A/A   |
| 2221                           | 48                 | Heterozygote G/A |
| 2033                           | 47                 | Wildtype G/G     |
| 2064                           | 47                 | Heterozygote G/A |
| 2213                           | 47                 | Heterozygote G/A |
| 2158                           | 45                 | Homozygote A/A   |
| 2204                           | 45                 | Wildtype G/G     |
| 2229                           | 45                 | Wildtype G/G     |
| 2231                           | 45                 | Heterozygote G/A |
| 2337                           | 45                 | Homozygous A/A   |
| mPAP below this line $\leq 39$ |                    |                  |
| 2052                           | 39                 | Wildtype G/G     |
| 2135                           | 39                 | Homozygote A/A   |
| 2181                           | 39                 | Heterozygote G/A |
| 2311                           | 39                 | Wildtype G/G     |
| 2409                           | 39                 | Wildtype G/G     |
| 2019                           | 38                 | Wildtype G/G     |
| 2035                           | 38                 | Wildtype G/G     |
| 2039                           | 38                 | Wildtype G/G     |
| 2290                           | 38                 | Homozygous A/A   |
| 2356                           | 38                 | Wildtype G/G     |
| 2111                           | 37                 | Wildtype G/G     |
| 2248                           | 37                 | Wildtype G/G     |
| 2396                           | 37                 | Homozygote A/A   |
| 2349                           | 36                 | Wildtype G/G     |
| 2402                           | 36                 | Wildtype G/G     |
| 2145                           | 35                 | Wildtype G/G     |

**Supplementary Table 3**

| <b><u>Gene Symbol</u></b> | <b><u>Gene Title</u></b>                                     | <b><u>Fold Change</u></b> | <b><u>T-Test</u></b> |
|---------------------------|--------------------------------------------------------------|---------------------------|----------------------|
| ANG                       | angiogenin, ribonuclease, RNase A family, 5                  | 1.4                       | 2.4E-02              |
| BNIP3L                    | BCL2/adenovirus E1B 19kDa interacting protein 3-like         | 1.4                       | 1.0E-03              |
| CADM1                     | cell adhesion molecule 1                                     | 1.8                       | 3.6E-04              |
| CD59                      | CD59 molecule, complement regulatory protein                 | 1.9                       | 2.6E-03              |
| CYB5A                     | CYB5 protein                                                 | 1.4                       | 1.5E-04              |
| DUSP1                     | dual specificity phosphatase 1                               | 1.6                       | 1.2E-02              |
| ECE1                      | endothelin converting enzyme 1                               | 1.4                       | 5.5E-05              |
| FOS                       | FBJ murine osteosarcoma viral oncogene homolog               | 1.6                       | 2.0E-02              |
| GADD45B                   | growth arrest and DNA-damage-inducible, beta                 | 1.5                       | 2.2E-02              |
| GYS1                      | glycogen synthase 1 (muscle)                                 | 1.4                       | 2.0E-04              |
| ISG20                     | interferon stimulated exonuclease gene 20kDa                 | 1.8                       | 2.3E-02              |
| JUN                       | jun oncogene                                                 | 1.7                       | 5.8E-05              |
| KLF6                      | Kruppel-like factor 6                                        | 1.7                       | 3.3E-03              |
| NDRG1                     | N-myc downstream regulated 1                                 | 1.6                       | 1.1E-04              |
| NFIL3                     | nuclear factor, interleukin 3 regulated                      | 2.5                       | 7.2E-04              |
| PAM                       | peptidylglycine alpha-amidating monooxygenase                | 1.7                       | 1.8E-05              |
| PFKFB3                    | 6-phosphofructo-2-kinase/fructose-2,6-biphosphatase 3        | 1.6                       | 7.2E-03              |
| PLAC8                     | placenta-specific 8                                          | 1.9                       | 2.5E-02              |
| PLAUR                     | plasminogen activator, urokinase receptor                    | 1.5                       | 1.9E-03              |
| S100A4                    | S100 calcium binding protein A4                              | 1.3                       | 3.5E-03              |
| SAT1                      | spermidine/spermine N1-acetyltransferase 1                   | 1.5                       | 8.3E-03              |
| SCARB1                    | scavenger receptor class B, member 1                         | 1.4                       | 3.6E-04              |
| SERPINE1                  | serpin peptidase inhibitor, clade E                          | 1.9                       | 6.0E-06              |
| SORL1                     | sortilin-related receptor, L(DLR class) A repeats-containing | 1.6                       | 6.6E-04              |
| TXNIP                     | thioredoxin interacting protein                              | 1.3                       | 5.2E-03              |
| vldlr                     | very low density lipoprotein receptor                        | 2.3                       | 3.4E-07              |
| ZMYND8                    | Zinc finger, MYND-type containing 8                          | -1.5                      | 7.1E-03              |

## Supplementary Methods

### **TaqMan Allelic Discrimination Protocol**

SNP assays need to be diluted to a 20X working concentration with 1XTE and aliquoted (stock assay concentration is 40X or 80X, depending on the assay ordered).

- 11.25uL gDNA + H<sub>2</sub>O, with a gDNA concentration of 1-20ng total is needed per rxn
- If possible, two controls are needed
  - o Positive control: homozygous or heterozygous for SNP
  - o Negative control: NTC, add water instead of gDNA
- If you have many gDNA samples, it is helpful to dilute the gDNA in a 96 well plate. Example: dilute DNA to ~5ng/uL with nuclease free H<sub>2</sub>O and use 2uL per rxn (10ng gDNA total).

Setting up reaction:

#### 1X Rxn Mix

12.5uL TaqMan Universal PCR Master Mix (2X), No AmpErase UNG (LifeTech: 4324018)  
1.25uL 20X SNP Genotyping Assay  
13.75 Total

Make a Reaction Master Mix for all samples; be sure to include NTC and one extra in calculation for pipet, flick tube to mix well, spin down then pipet 13.75uL per well.

In a 96 well plate, pipet:

9.25uL H<sub>2</sub>O  
2.0uL gDNA (diluted)  
13.75uL Rxn Mix  
25uL Reaction Volume

Seal plate, lightly vortex, spin down and run on Real Time Machine.

### **Allelic Discrimination Setup on ABI 7500 Real Time Machine (7500 Software v2.0.4)**

Put plate in machine and turn on.

Double click 7500 icon on desktop.

From homepage choose Advanced Setup

- Name experiment starting with the date
- Choose 7500 (96 wells)

- Choose Genotyping for experiment type (click yes on popup)
- Choose TaqMan Reagents
- Choose Standard Run

#### Experiment Menu

##### Plate Setup

- Click on SNP Assay1, Edit, Edit SNP Assay
- Name Assay (ex. EPAS1snp1)
- Give Assay ID (ex. Ala606Thr)
- Allele 1 Name or Base(s) (ex. G) Reporter (ex. VIC)
- Allele 2 Name or Base(s) (ex. A) Reporter (ex. FAM)
- Click ok when finished

##### Assign Sample to Selected Wells

- Enter all sample ID's, click new sample until all samples are entered (label one NTC)
- Assign all samples to plate map on right by clicking a well then checking the box next to the correct sample
- Hi-light all wells that contain a sample, do not hi-light NTC
- Click check box next to SNP Assay, click on the drop down menu under task and choose unknown
- Hi-light the well with NTC, assign the SNP Assay, click the drop down menu under task and choose Negative Control

##### Run Method

- Change Reaction Volume to 25uL
- Make sure Pre-PCR Read and Amplification are checked (they should be checked by default)

##### Cycle Conditions:

95°C 10 min (AmpliTaq Gold Enzyme Activation)

40 Cycles

92°C 15 sec (Denature)

60°C 1 min (Anneal/Extend)

##### Run

- Click on green start button
- Run will finish in ~90 minutes

##### Run Complete

- Click green Analyze button
- Save file
- Turn machine off

## EPAS1 Protocol

**G**CC>ACC Ala606Thr rs211641317 (no freq info)

**G**GT>AGT Gly610Ser rs208684340 (no freq info)

**tggaagaatgactgagtggaagg**agacgcgcaggaaggctgtagcactgtcagaagaccttccacacttgaagacacatctgtgtttcctctcttgggcccccaagaccttggcgctgccaggctgtgcaggaggaatgcctcgggcgggagcggggatgaggggc taagatgagacagcgtccttgaggcagtgcccactgctgagctgctttgcc**cctgctctgtgtcttctagACTG**ACTTTAACG AGCTGGATTTGGAGACCCTGGCACCTTACATCCCATGGACGGAGAGGACTTCCAGCTTAGCCCC ATCTGCCCTGAGGAGAGCCTCCTGCCGGAGACCCCCAGTCGGCCCCCAGCACTGCTTCAGCACC ATGTCAAACATCTTCCAGCCACTGGCTCCGATGGCCTCTCACAGCACCTTCCTCCTGGACAAGTA TCAGCA**GCAGCTGGAAAGCAAGAAGAC**GG**AGCCTGAGCCTTCTT**TGAC**G**GTGGGAGCAG**GGTGT CCCTGCTGCAGT**GCTGTGGTCAGACCTACACCCCCCTCTCCTCCATGGGGGGCATTCCAACACCC AGTGGCCCCCTGACCCACCACTACAGCTGGGGCCACGAAGTGGCCTGGTGAAGACCGGCACGCA GAGGCCGTGGGGCAGCGCCCCCTGGGGCTCCCCCGCCACACCCCATCTCGCCATGCTCAAGAAG AGgtcagtgatggagatgctgggctgcttcagctaaggctgtgcagtatgggggaggaggtacagacaggtgccactagggggcaggatggggctccaaaaggcccctggccccatccccagtttccatccgacagaggtgcgatatgccgcttagccttctcaactctg agagcttgggcttaggggactcgcctaagatatgtgaggcctcgcgtgggacacatt**tatcagagctggagaccaagaga**

## PCR Primers

EPAS1-F **tggaagaatgactgagtggaagg**

EPAS1-R **TCTCTGGTCTCCAGCTCTGATA**

PCR Product: 986 bp

## Seq Primer

EPAS1seq-F **cctgctctgtgtcttctagACTG**

## TaqMan SNP1 Assay Ala606Thr:

Forward Primer **GCAGCTGGAAAGCAAGAAGAC**

Reverse Primer ACTGCAGCAGGGACACC (**GGTGTCCCTGCTGCAGT**)

Reporter 1 Seq WT\_VIC **AGCCTGAGCCTTCTT**

Reporter 2 Seq VAR\_FAM AGCCTGA**A**CCTTCTT

## TaqMan SNP2 Assay Gly610Ser:

Forward Primer **GCAGCTGGAAAGCAAGAAGAC**



Reverse Primer                    ACTGCAGCAGGGACACC (**GGTGTCCCTGCTGCAGT**)  
Reporter 1 Seq WT\_VIC                    TGCTCCCACCGTCAA (**TTTGACGGTGGGAGCA**)  
Reporter 2 Seq VAR\_FAM                    TGCTCCCAC**T**GTCAA (**TTTGACAGTGGGAGCA**)

PCR using Platinum Taq (for PCR products < 4kb)

1X Master Mix (1µl DNA)

|                          |                             |
|--------------------------|-----------------------------|
| H <sub>2</sub> O         | 18.15µl                     |
| 10X PCR Buffer, Minus Mg | 2.5µl                       |
| 50mM MgCl <sub>2</sub>   | 0.75µl                      |
| 10mM dNTP                | 0.5µl                       |
| 10µM Primer-F            | 1.0µl                       |
| 10µM Primer-R            | 1.0µl                       |
| Platinum Taq             | <u>0.1µl</u>                |
|                          | 24.0µl                      |
|                          | <u>Add 1µl DNA (180 ng)</u> |
| Final Volume             | 25µl                        |

Cycling Conditions

94° 30 sec  
35 cycles  
94° 30 sec  
58° 30 sec  
72° 1 min  
68° 3min  
4° ∞

**Sequencing Protocol (8-20-2013)**

**Using 2µl BigDye and 2µl PCR product**

**Master Mix**

3.5 µl H<sub>2</sub>O  
2.0 µl Big Dye v.3.1  
2.5 µl Primer (10 µM)  
8.0 µl Total Volume

Add:

**ng template used in Seq rx'n based on PCR product size:**

**0.1 kb PCR: 2 – 3 ng / seq rx'n**  
**0.15kb PCR: 3.5 – 4.5 ng / seq rx'n**  
  
**0.2kb PCR: 5 – 6 ng / seq rx'n**  
  
**0.3 kb PCR: 7 – 9 ng / seq rx'n**  
  
**0.5 kb PCR: 12 – 15 ng / seq rx'n**  
  
**1 kb PCR: 25 – 30 ng / seq rx'n**  
  
**2 kb PCR: 50 - 60 ng / seq rx'n**  
  
**3 kb PCR: 75 – 90 ng / seq rx'n**  
  
**4 kb PCR: 100 – 120 ng / seq rx'n**  
  
**5 kb PCR: 125 – 150 ng / seq rx'n**  
  
**6 kb PCR: 150 – 180 ng / seq rx'n**  
  
**7 kb PCR: 175 – 210 ng / seq rx'n**  
  
**8 kb PCR: 200 – 240 ng / seq rx'n**

**Note:** If using less than the recommended amount of template, the amount of Big Dye must be increased.

If reducing the amount of template by 25-30% use 3µl Big Dye (0.5 µl 5X buf)

2.0 µl Exo-sapped PCR product  
10.0 µl Total Volume

### Using 2µl BigDye and 1.5µl PCR product

#### Master Mix

3.0 µl H<sub>2</sub>O  
1.0 µl 5X Seq Buf  
2.0 µl Big Dye v.3.1  
2.5 µl Primer (10 µM)  
8.5 µl Total Volume

Add:

1.5 µl Exo-sapped PCR product  
10.0 µl Total Volume

### Using 2µl BigDye and 1µl PCR product

#### Master Mix

3.5 µl H<sub>2</sub>O  
1.0 µl 5X Seq Buf  
2.0 µl Big Dye v.3.1  
2.5 µl Primer (10 µM)  
9.0 µl Total Volume

Add:

1.0 µl Exo-sapped PCR product  
10.0 µl Total Volume

#### Big Dye Cycling

95°C, 5min

95°C, 30 sec

55°C, 10 sec

60°C, 4 min

30 cycles

### Product Cleanup (EtOH Precipitation or Dye Ex)

#### A. Clean up by Ethanol Precipitation:

1. Remove the 96-well plate from PCR machine and spin down.
2. Add 2.5 µl of 125mM EDTA to each well. Make sure it reaches bottom.
3. Add 30 µl of 100% ethanol to each well.
4. Seal with caps or tape and mix by inverting 4 times.
5. Incubate at room temperature for 15 min.
6. Spin the plate at 4°C at 2885xg for 30 min.

7. Immediately invert the plate and spin up to 180xg, then remove from centrifuge.
8. Add 30  $\mu$ l of 70% ethanol to each well.
9. Spin at 4°C at 1650xg for 15 min.
10. Invert the plate and spin up to 180xg for 1 min, then remove from centrifuge.
11. Add 10  $\mu$ l formamide to each well and spin down.
12. Transfer to a 3100 plate and RUN!  
Note: can increase sample uptake on ABI machine to 40 sec (normal is 16 sec).  
This will increase sample signal.

#### **B. Clean up by DyeEx Cartridge (Qiagen)**

1. Vortex cartridge
2. Snap off bottom tab, loosen cap on cartridge, & place in a collection tube
3. Spin at 750xg for 3 min
4. Transfer cartridge to a new collection tube (label tube with sample ID)
5. Apply sample dropwise to gel
6. Spin at 750xg for 3 min (no cap on cartridge)
7. Throw away cartridge (sample in collection tube)
8. Transfer sample to a 1.5 ml eppendorf tube
9. Dry in speed-vac with heat on high
10. Add 10  $\mu$ l formamide to each tube and spin down.
